# Supplementary material for: Pressure-induced coupled structural–electronic transition in SnS2 under different hydrostatic environments up to 39.7 GPa
Source: Royal Society of Chemistry journal article supplement (doi:10.1039/d1ra08632d), 2022-01-01
Supplement: d1ra08632d1.pdf [file d1ra08632d1.pdf]

ARTICLE

## Pressure-induced coupled structural-electronic transition in SnS<sub>2</sub> under different hydrostatic environments up to 39.7 GPa

Received 00th January 20xx,  
Accepted 00th January 20xx

Xinyu Zhang,<sup>ab</sup> Lidong Dai,<sup>\*a</sup> Haiying Hu,<sup>\*a</sup> Meiling Hong<sup>ab</sup> and Chuang Li<sup>ab</sup>

DOI: 10.1039/x0xx00000x

### Supplementary Figures and Tables

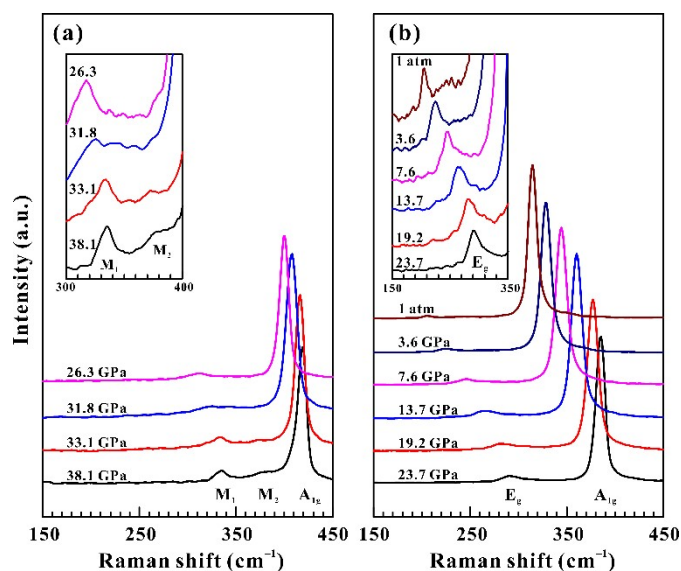

**Supplementary Figure 1.** (a) and (b) Raman scattering spectra of SnS<sub>2</sub> at some representative pressure points in the process of decompression under non-hydrostatic condition. Inset: the corresponding enlarged pictures of the E<sub>g</sub>, M<sub>1</sub> and M<sub>2</sub> modes.

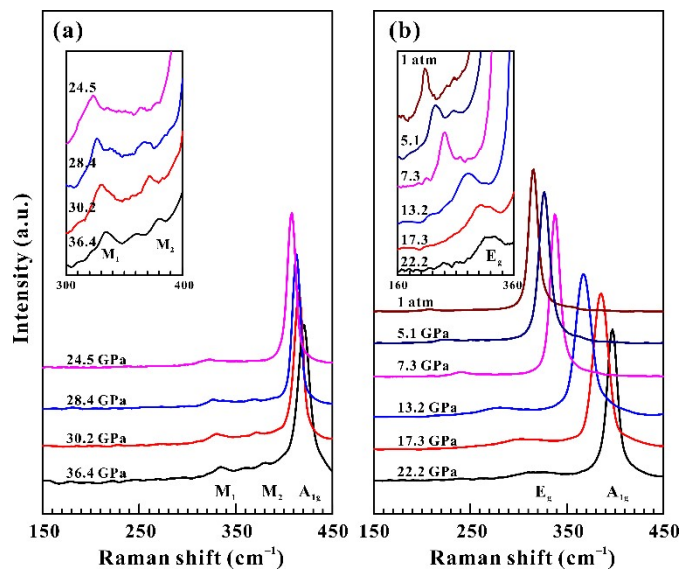

**Supplementary Figure S2.** (a) and (b) Raman scattering spectra of SnS<sub>2</sub> at some representative pressure points in the process of decompression under hydrostatic condition. Inset: the corresponding enlarged pictures of the E<sub>g</sub>, M<sub>1</sub> and M<sub>2</sub> modes.

<sup>a</sup> Key Laboratory of High-temperature and High-pressure Study of the Earth's Interior, Institute of Geochemistry, Chinese Academy of Sciences, Guiyang, Guizhou 550081, China.

<sup>b</sup> University of Chinese Academy of Sciences, Beijing 100049, China.

Electronic Supplementary Information (ESI) available: [details of any supplementary information available should be included here]. See DOI: 10.1039/x0xx00000x

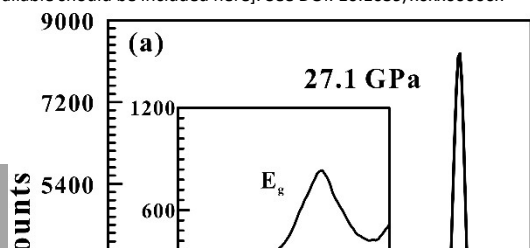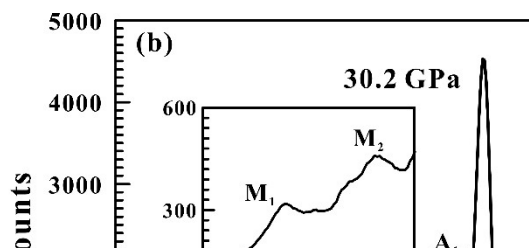

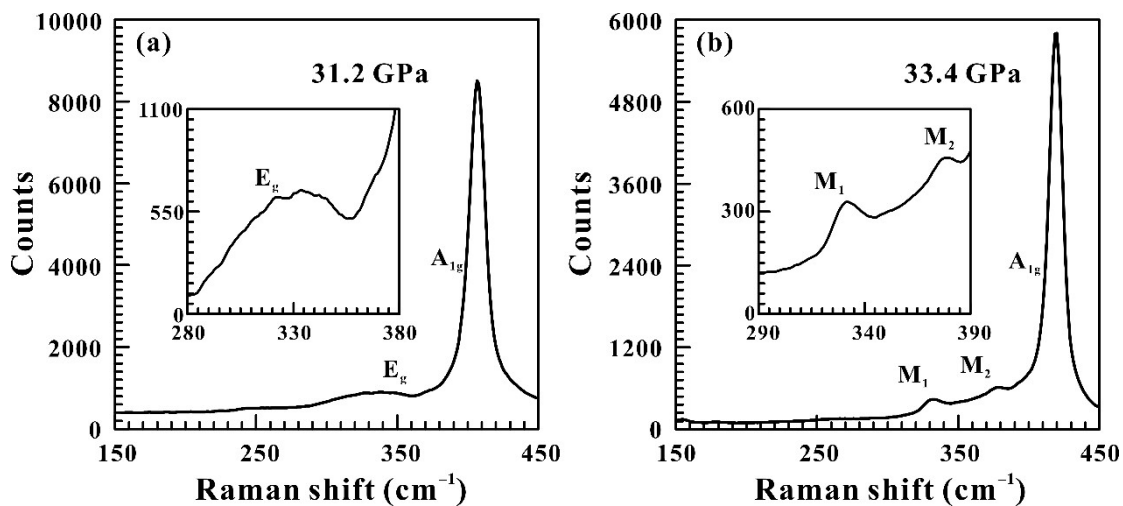

**Supplementary Figure 4** Comparison of Raman intensity of the A<sub>1g</sub>, E<sub>g</sub>, M<sub>1</sub> and M<sub>2</sub> modes before and after the coupled structural-electronic transition under hydrostatic condition at the corresponding pressure point of (a) 31.2 GPa and (b) 33.4 GPa, respectively.

**Supplementary Table 1:** Pressure dependence of Raman shifts and Raman FWHM for SnS<sub>2</sub> in the process of compression under hydrostatic condition up to 39.7 GPa.  $\omega$  is Raman shift,  $F$  is Raman FWHM and  $P$  is pressure.

|                               | Mode            | 0.5 GPa–31.2 GPa | 33.4 GPa–39.7 GPa |
|-------------------------------|-----------------|------------------|-------------------|
| Raman shifts ( $d\omega/dP$ ) | E <sub>g</sub>  | 4.90             | –                 |
|                               | A <sub>1g</sub> | 3.25             | 0.96              |
|                               | M <sub>1</sub>  | –                | 1.33              |
|                               | M <sub>2</sub>  | –                | 1.02              |
| Raman FWHM ( $dF/dP$ )        | E <sub>g</sub>  | 1.59             | –                 |
|                               | A <sub>1g</sub> | 0.05             | 0.07              |
|                               | M <sub>1</sub>  | –                | –0.52             |
|                               | M <sub>2</sub>  | –                | –4.17             |
