# Supplementary figures and images for: Pressure-induced coupled structural–electronic transition in SnS2 under different hydrostatic environments up to 39.7 GPa
Source: Royal Society of Chemistry journal article supplement (doi:10.1039/d1ra08632d), 2022-01-01

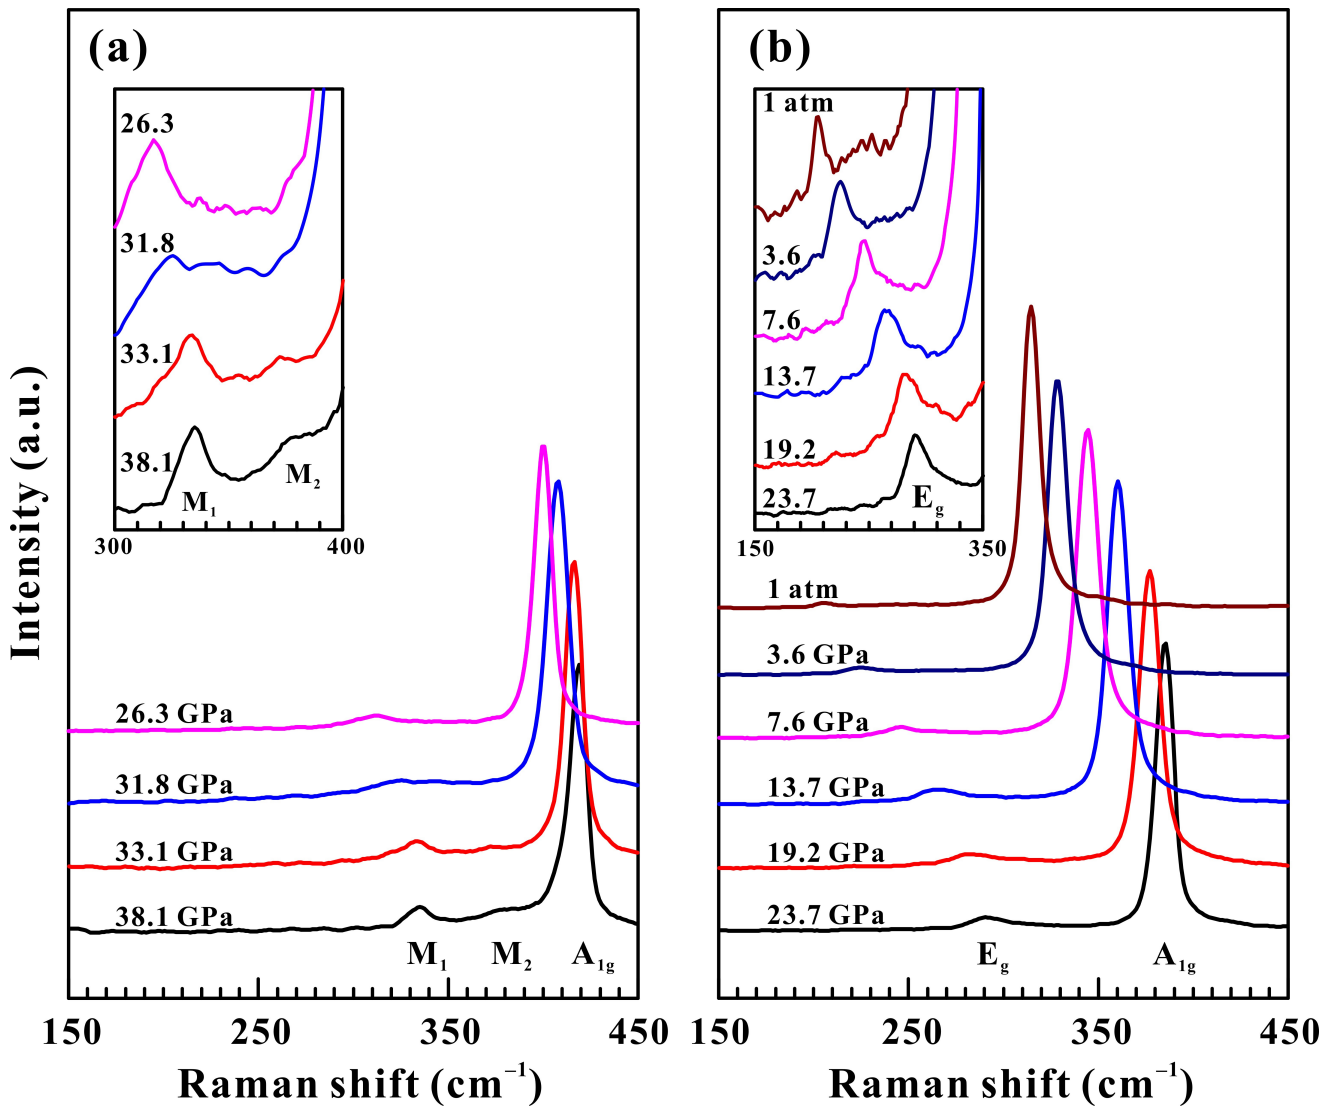

Supplement: d1ra08632d2.pdf [file d1ra08632d2.pdf]

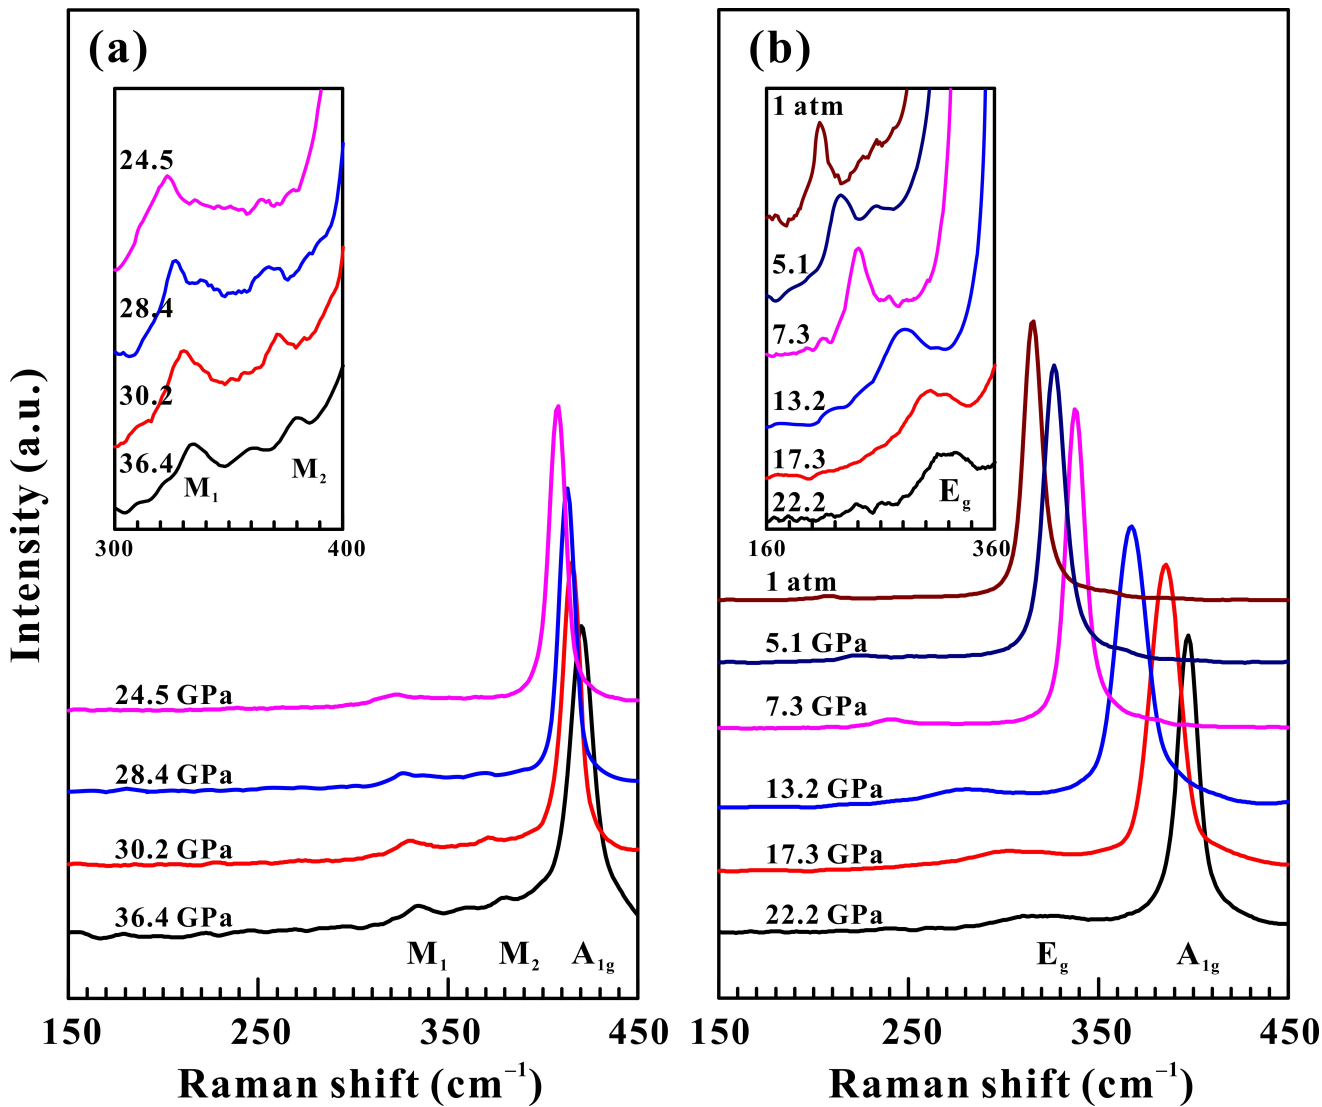

Supplement: d1ra08632d3.pdf [file d1ra08632d3.pdf]

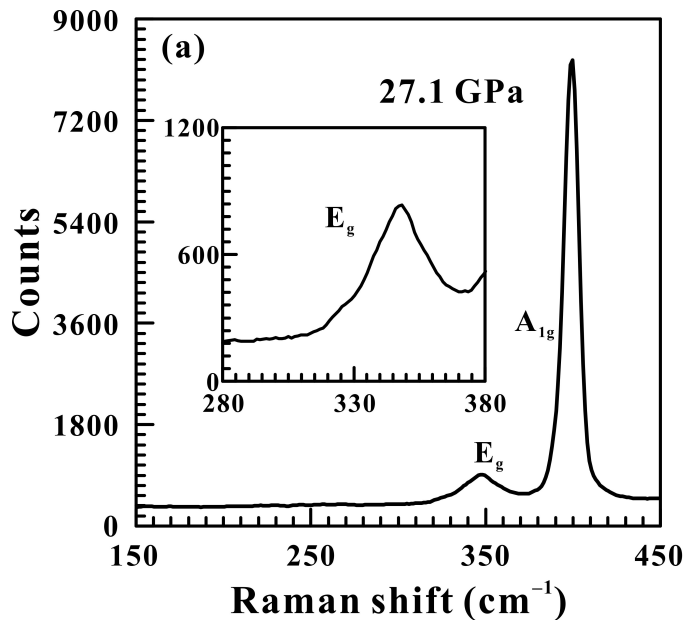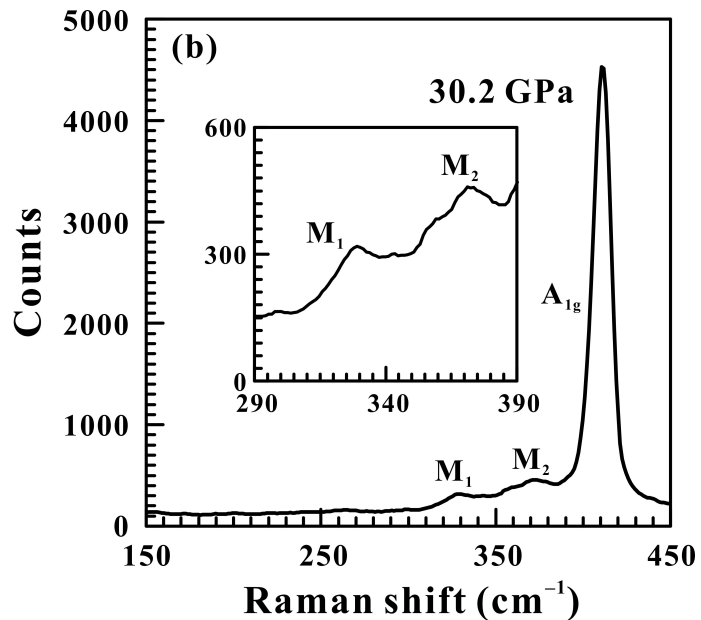

Supplement: d1ra08632d4.pdf [file d1ra08632d4.pdf]

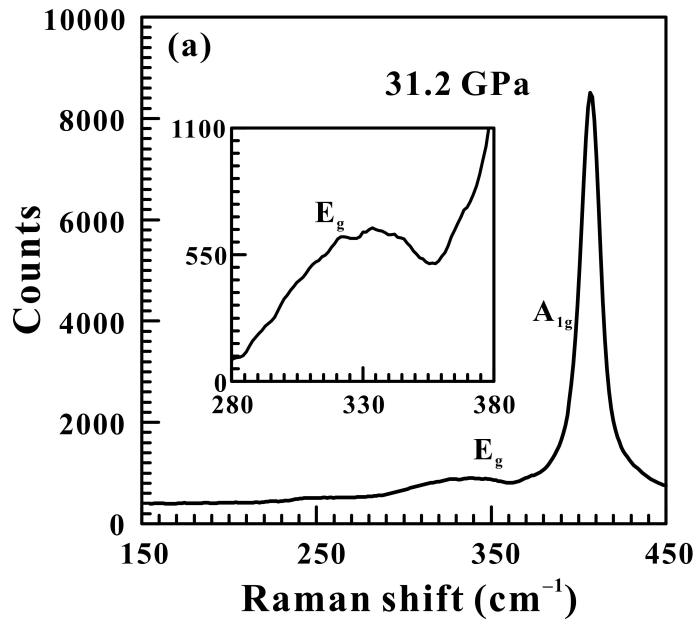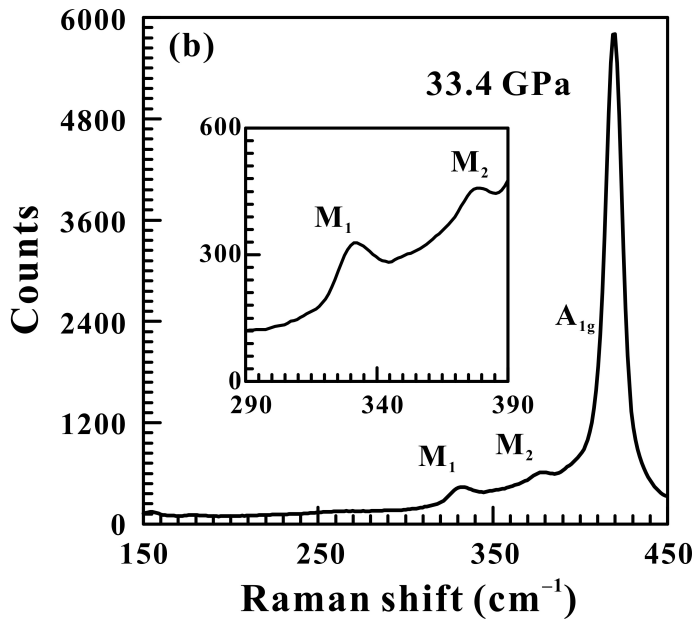

Supplement: d1ra08632d5.pdf [file d1ra08632d5.pdf]
